# Supplementary material for: Genetic adaptation of the human circadian clock to day-length latitudinal variations and relevance for affective disorders
Source: PubMed Central journal article supplement (PMC4237747; doi:10.1186/s13059-014-0499-7), 2014-10-30
Supplement: 13059_2014_499_MOESM1_ESM.pdf [file 13059_2014_499_MOESM1_ESM.pdf]

**Additional data file 1.** Populations in the HGDP-CEPH panel and  $\Delta$ photoperiod

| <b>Population</b> | <b>Country</b>               | <b>Sampled individuals</b> | <b><math>\Delta</math>photoperiod (hours)</b> |
|-------------------|------------------------------|----------------------------|-----------------------------------------------|
| Bantu North East  | Kenya                        | 11                         | 0.3472                                        |
| Bantu South East  | South Africa                 | 8                          | 3.2015                                        |
| Biaka Pygmies     | Central African Republic     | 23                         | 0.4634                                        |
| Mandenka          | Senegal                      | 22                         | 1.4103                                        |
| Mbuti Pygmies     | Democratic Republic of Congo | 13                         | 0.1156                                        |
| San               | Namibia                      | 5                          | 2.5552                                        |
| Yoruba            | Nigeria                      | 21                         | 0.9317                                        |
| Colombians        | Colombia                     | 7                          | 0.3472                                        |
| Karitiana         | Brazil                       | 14                         | 1.1694                                        |
| Maya              | Mexico                       | 21                         | 2.2899                                        |
| Pima              | Mexico                       | 14                         | 3.7091                                        |
| Surui             | Brazil                       | 8                          | 1.2894                                        |
| Balochi           | Pakistan                     | 24                         | 3.9467                                        |
| Brahui            | Pakistan                     | 25                         | 3.9467                                        |
| Burusho           | Pakistan                     | 25                         | 4.99139                                       |
| Hazara            | Pakistan                     | 22                         | 4.44821                                       |
| Kalash            | Pakistan                     | 23                         | 4.89757                                       |
| Makrani           | Pakistan                     | 25                         | 3.2562                                        |
| Pathan            | Pakistan                     | 23                         | 4.44821                                       |
| Sindhi            | Pakistan                     | 24                         | 3.1833                                        |
| Uygur             | China                        | 10                         | 6.60288                                       |
| Cambodians        | Cambodia                     | 10                         | 1.4103                                        |
| Dai               | China                        | 10                         | 2.5553                                        |
| Daur              | China                        | 9                          | 7.82877                                       |
| Han               | China                        | 44                         | 4.27681                                       |
| Hezhen            | China                        | 9                          | 7.53369                                       |
| Japanese          | Japan                        | 29                         | 5.28149                                       |
| Lahu              | China                        | 8                          | 2.6909                                        |
| Miaozu            | China                        | 10                         | 3.555                                         |
| Mongola           | China                        | 10                         | 7.82877                                       |
| Naxi              | China                        | 8                          | 3.2562                                        |
| Oroqen            | China                        | 9                          | 8.46656                                       |
| She               | China                        | 10                         | 3.4041                                        |
| Tu                | China                        | 10                         | 4.89757                                       |
| Tujia             | China                        | 10                         | 3.7091                                        |
| Xibo              | China                        | 9                          | 6.48107                                       |
| Yakut             | Russia                       | 25                         | 15.60641                                      |
| Yizu              | China                        | 10                         | 3.555                                         |
| Adygei            | Russia                       | 17                         | 6.60288                                       |
| French            | France                       | 28                         | 7.11689                                       |
| French Basque     | France                       | 24                         | 6.3616                                        |

|                |                           |    |          |
|----------------|---------------------------|----|----------|
| North Italian  | Italy                     | 13 | 7.11689  |
| Orcadian       | Orkney Islands (Scotland) | 15 | 12.33234 |
| Russian        | Russia                    | 25 | 13.75006 |
| Sardinian      | Italy                     | 28 | 5.69086  |
| Tuscan         | Italy                     | 8  | 6.3616   |
| Bedouin        | Israel                    | 46 | 4.0277   |
| Druze          | Israel                    | 42 | 4.19279  |
| Mozabite       | Algeria                   | 29 | 4.19279  |
| Palestinian    | Israel                    | 46 | 4.19279  |
| NAN Melanesian | Papua New Guinea          | 11 | 0.6966   |
| Papuan         | Papua New Guinea          | 17 | 0.4634   |

---
