# Supplementary material for: Genetic adaptation of the human circadian clock to day-length latitudinal variations and relevance for affective disorders
Source: PubMed Central journal article supplement (PMC4237747; doi:10.1186/s13059-014-0499-7), 2014-10-30
Supplement: 13059_2014_499_MOESM4_ESM.pdf [file 13059_2014_499_MOESM4_ESM.pdf]

**Additional data file 4.** Resampling results with SNP-matched random gene sets.

| <b>Gene set</b>                                     | <b>N genes<sup>a</sup></b> | <b>N SNPs<sup>b</sup></b> | <b>N significant genes<sup>c</sup></b> | <b>Median number of sample SNPs<sup>d</sup></b> | <b>Empirical p value<sup>e</sup></b> |
|-----------------------------------------------------|----------------------------|---------------------------|----------------------------------------|-------------------------------------------------|--------------------------------------|
| <b>Core circadian</b>                               | 12                         | 175                       | 7                                      | 172                                             | 0.044                                |
| <b>Circadian hits (RNAi screen)</b>                 | 223                        | 3863                      | 40                                     | 3853                                            | 0.021                                |
| <b>Mouse circadian/sleep disturbance</b>            | 82                         | 2588                      | 23                                     | 2609                                            | 0.046                                |
| <b>Mendelian diseases causing sleep disturbance</b> | 11                         | 562                       | 7                                      | 554                                             | 0.029                                |
| <b>Melanopisn signaling</b>                         | 13                         | 575                       | 7                                      | 583                                             | 0.406                                |
| <b>All (merging of the 5 sets)</b>                  | 341                        | 7763                      | 52                                     | 7897                                            | 0.040                                |

<sup>a</sup> Number of genes with at least one SNP genotyped in the study set

<sup>b</sup> Number of SNPs in the study set

<sup>c</sup> Number of genes in the study set showing at least one SNP significantly correlated with photoperiod variation

<sup>d</sup> Median number of SNPs in the random sets

<sup>e</sup> Empirical p value calculated as described in the text and Supplementary Text S1.
