# Supplementary material for: Genetic adaptation of the human circadian clock to day-length latitudinal variations and relevance for affective disorders
Source: PubMed Central journal article supplement (PMC4237747; doi:10.1186/s13059-014-0499-7), 2014-10-30

**Additional data file 5. Distribution of SNP content.** (A) Histogram of SNP content for the 15,285 genes carrying at least one SNP genotyped in the HGDP-CEPH panel. (B) Binning of genes into SNP content classes.

**A**

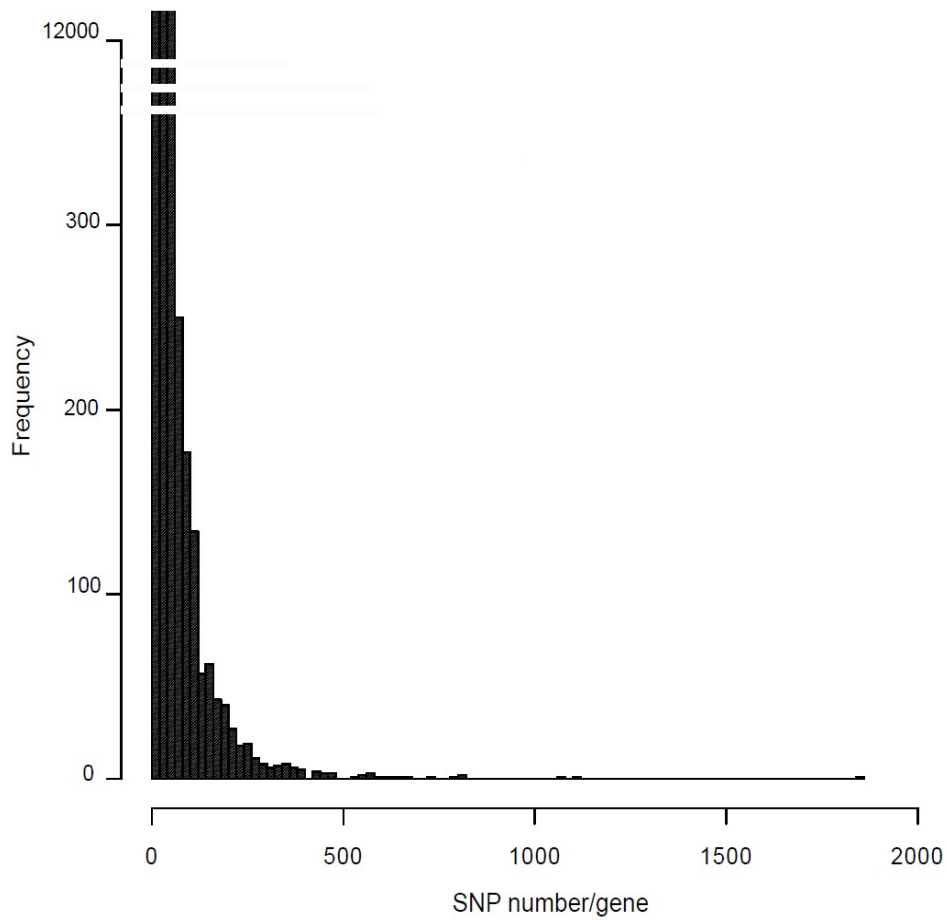

**B**

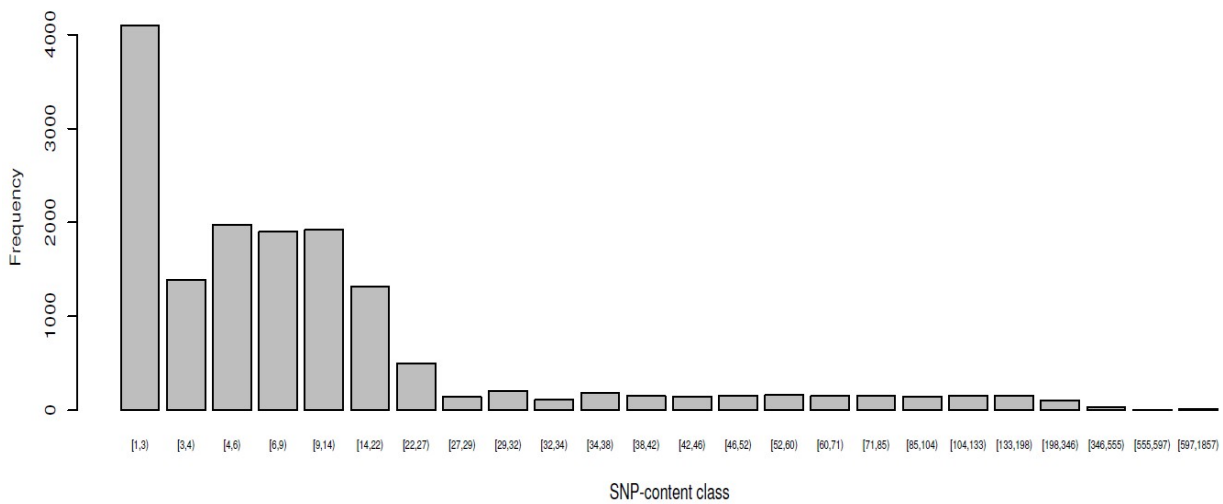

Supplement: 13059_2014_499_MOESM5_ESM.pdf [file 13059_2014_499_MOESM5_ESM.pdf]
