# Supplementary material for: Genetic adaptation of the human circadian clock to day-length latitudinal variations and relevance for affective disorders
Source: PubMed Central journal article supplement (PMC4237747; doi:10.1186/s13059-014-0499-7), 2014-10-30
Supplement: 13059_2014_499_MOESM6_ESM.pdf [file 13059_2014_499_MOESM6_ESM.pdf]

**Additional data file 6.** Resampling analysis with different environmental variables.

| Gene set                                            | N genes <sup>a</sup> | N significant genes <sup>b</sup> | Empirical p value <sup>c</sup>     | Contributing genes <sup>d</sup>                                                                                                            |
|-----------------------------------------------------|----------------------|----------------------------------|------------------------------------|--------------------------------------------------------------------------------------------------------------------------------------------|
| <b>Core circadian</b>                               | 12                   | 5                                | 0.076 (minimum temperature)        | <i>NPAS2, PER2, ARNTL2, CSNK1D, CSNK1E</i>                                                                                                 |
|                                                     |                      | 0                                | 1 (maximum temperature)            | -                                                                                                                                          |
|                                                     |                      | 2                                | 0.1987 (short wave radiation flux) | <i>ARNTL2, CSNK1E</i>                                                                                                                      |
|                                                     |                      | 6                                | 0.0191 ( $\Delta$ temperature)     | <i>NPAS2, PER2, ARNTL, ARNTL2, CSNK1D, CSNK1E</i>                                                                                          |
| <b>Circadian hits (RNAi screen)</b>                 | 223                  | 18                               | 0.187 (minimum temperature)        | <i>TPO, ANTXR1, CMTM7, SCHIP1, TBC1D9, PTK2, SH3GL2, ABL1, GPR158, FAM55D, BRCA2, RAB20, CTDPI, HOMER3, SLC8A2, SLC24A3, PWP2, MKL1</i>    |
|                                                     |                      | 0                                | 1 (maximum temperature)            | -                                                                                                                                          |
|                                                     |                      | 2                                | 0.359 (short wave radiation flux)  | <i>SCHIP1, SLC8A2</i>                                                                                                                      |
|                                                     |                      | 19                               | 0.249 ( $\Delta$ temperature)      | <i>LZTR2, TPO, ANTXR1, CMTM7, FHIT, TBC1D9, ASB5, JAZF1, SCARA3, POPI, PTK2, SH3GL2, ABL1, GPR158, FAM55D, BRCA2, RAB20, SLC24A3, MKL1</i> |
| <b>Mouse circadian/sleep disturbance</b>            | 82                   | 11                               | 0.199 (minimum temperature)        | <i>CAMK2A, EBF2, KCNB2, RORB, TNC, PRKG1, KCNMA1, NCAM1, RORA, NCOR1, APP</i>                                                              |
|                                                     |                      | 0                                | 1 (maximum temperature)            | -                                                                                                                                          |
|                                                     |                      | 1                                | 0.702 (short wave radiation flux)  | <i>DRD3</i>                                                                                                                                |
|                                                     |                      | 12                               | 0.192 ( $\Delta$ temperature)      | <i>CAMK2A, CADPS2, EBF2, RORB, TNC, PRKG1, KCNMA1, NCAM1, NOS1, RORA, NCOR1, APP</i>                                                       |
| <b>Mendelian diseases causing sleep disturbance</b> | 11                   | 4                                | 0.195 (minimum temperature)        | <i>NRXN1, HDAC4, DHCR7, SHANK3</i>                                                                                                         |

|                              |    |   |                                   |                                    |
|------------------------------|----|---|-----------------------------------|------------------------------------|
|                              |    | 0 | 1 (maximum temperature)           | -                                  |
|                              |    | 0 | 1.000 (short wave radiation flux) | -                                  |
|                              |    | 3 | 0.474 ( $\Delta$ temperature)     | <i>NRXN1, HDAC4, SHANK3</i>        |
| <b>Melanopisin signaling</b> | 13 | 3 | 0.538 (minimum temperature)       | <i>PRKCZ, TRPC7, PLCB4</i>         |
|                              |    | 0 | 1 (maximum temperature)           | -                                  |
|                              |    | 0 | 1 (short wave radiation flux)     | -                                  |
|                              |    | 4 | 0.285 ( $\Delta$ temperature)     | <i>PRKCZ, PIK3R1, TRPC7, PLCB4</i> |

<sup>a</sup> Number of genes with at least one SNP genotyped in the HGDP-CEPH panel;

<sup>b</sup> Number of genes showing at least one significant SNP;

<sup>c</sup> The empirical p value was calculated as described in the text and methods;

<sup>d</sup> Genes showing at least one significant SNP.
