# Supplementary material for: Genetic adaptation of the human circadian clock to day-length latitudinal variations and relevance for affective disorders
Source: PubMed Central journal article supplement (PMC4237747; doi:10.1186/s13059-014-0499-7), 2014-10-30

**Additional data file 7. SNP functional annotation for circadian core genes.** For each gene the SNP that correlates with  $\Delta$ photoperiod (underlined) and variants in LD ( $r^2 > 0.80$ ) in either CEPH (blue) or CHB+JPT (red) are shown relative to ENCODE annotations.

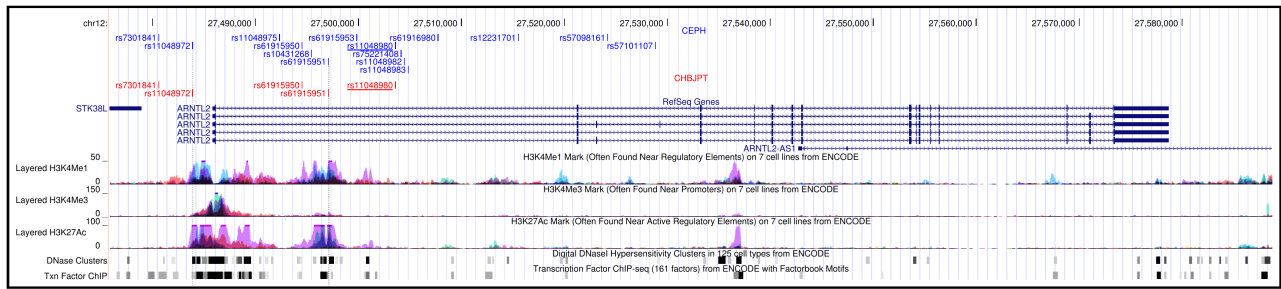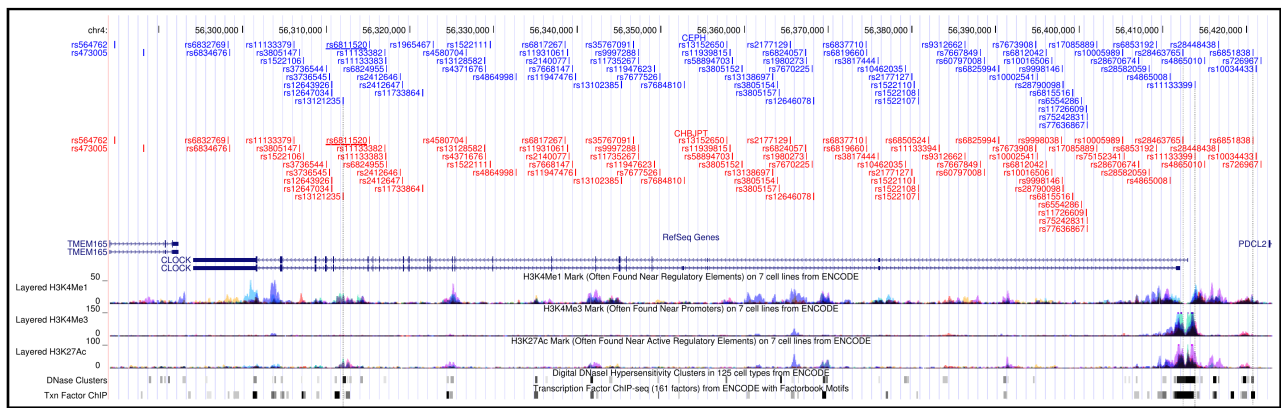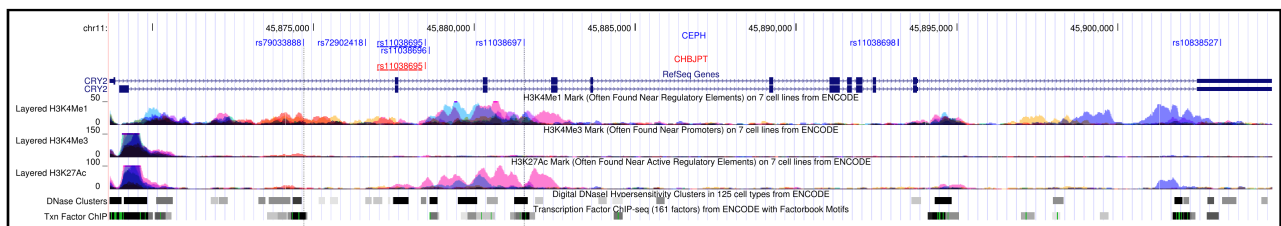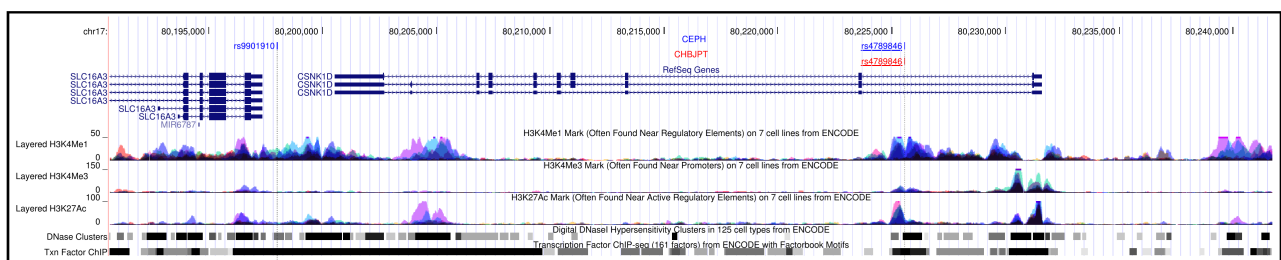

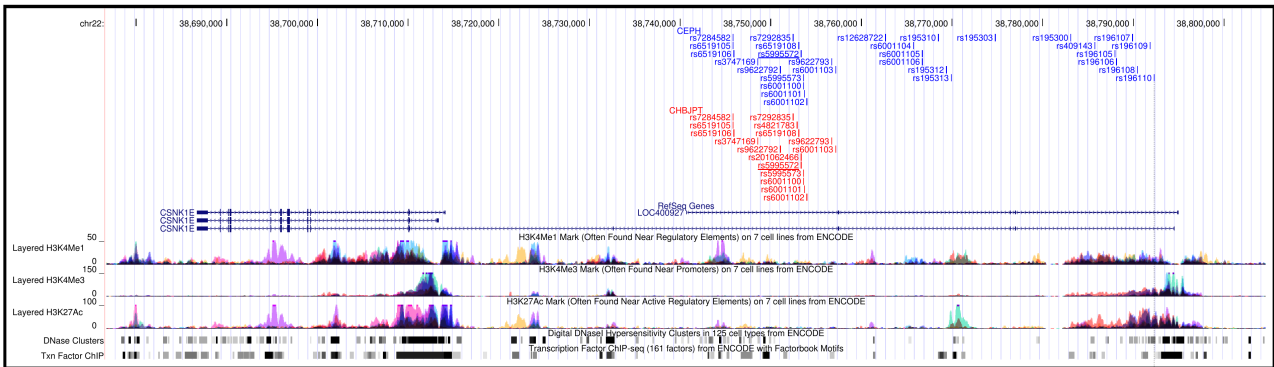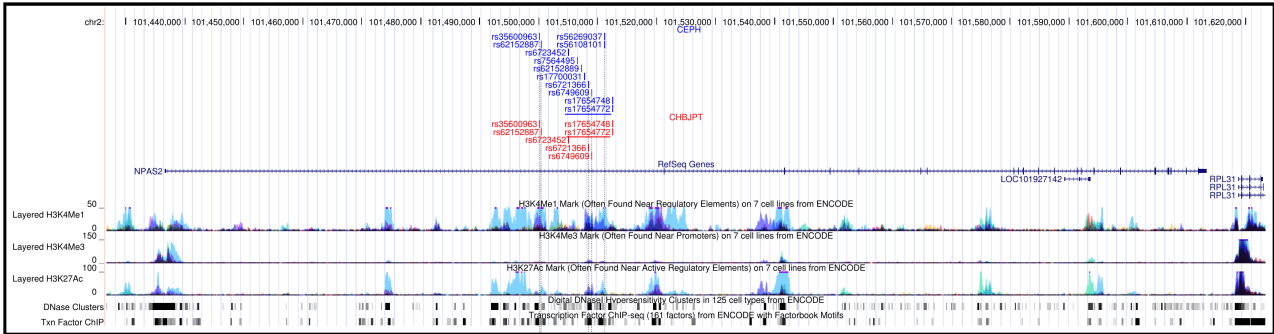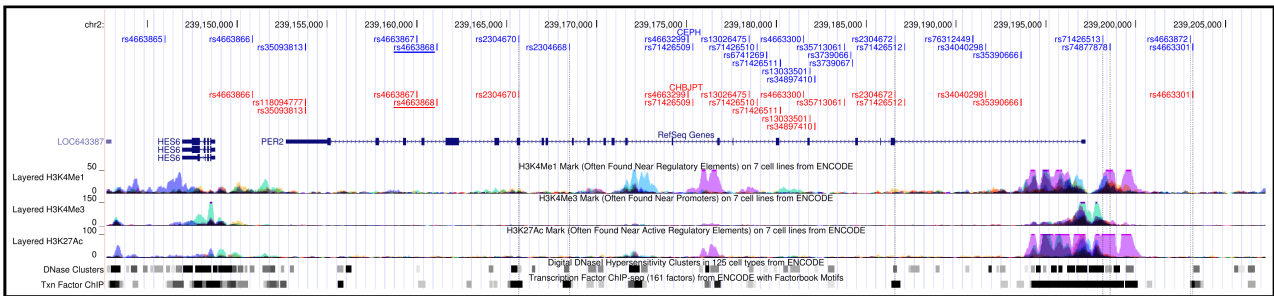

Supplement: 13059_2014_499_MOESM7_ESM.pdf [file 13059_2014_499_MOESM7_ESM.pdf]
